# Supplementary material
Source: ML conference proceedings conference paper supplement (https://openreview.net/forum?id=ji5isUwL3r)
Supplement: supplementary_material [file attachment]

---

# Supplementary Materials for LucidAction: A Hierarchical and Multi-model Dataset for Comprehensive Action Quality Assessment

---

Linfeng Dong<sup>1,2</sup>, Wei Wang<sup>2</sup>, Yu Qiao<sup>2</sup>, and Xiao Sun<sup>2</sup>

<sup>1</sup>Zhejiang University

<sup>2</sup>Shanghai Artificial Intelligence Laboratory

{donglinfeng, wangwei, sunxiao}@pjlab.org.cn, yu.qiao@siat.ac.cn

## 1 A. Experiment

### 2 A.1 Datasets

3 **AQA-7** [4] contains actions from seven different sport events, including gymnastic vaulting, big air  
4 skiing, big air snowboarding, synchronous diving 3m springboard, synchronous diving 10m platform  
5 and trampoline. Following the setting in [4, 1], we excluded the trampoline event with much longer  
6 videos than the other categories, resulting in 803 training videos and 303 testing videos. We use final  
7 score as assessment ground truth.

8 **MTL-AQA** [5] contains 1412 samples of diving covering individual, synchronous, 3m springboard  
9 and 10m platform events. Following the setting in [4, 1], we split the dataset into 1059 training  
10 samples and 353 testing samples. We use performance score as assessment ground truth. The  
11 performance score is given by final score divided by the difficulty value of actions in the sample.  
12 Difficulty values are known information during both training and inference.

13 **FineDiving** [8] contains 3000 samples of diving, covering 52 action categories, we split the dataset  
14 into 2251 training samples and 749 testing samples following the setting in [8]. We use performance  
15 score as assessment ground truth. The performance score is given by final score divided by the  
16 difficulty value of actions in the sample. Difficulty values are known information during both training  
17 and inference.

18 **LucidAction** is our newly proposed dataset which contains 6702 samples across 8 sport events  
19 including men’s/women’s floor exercise (MFE, WFE), vault (MVT, WVT), men’s parallel bars  
20 (MPB), horizontal bars (MHB), women’s uneven bar (WUB) and balance beam (WBB). We split  
21 the dataset into 5026 training samples and 1676 testing samples. Specially, we provide at least one  
22 perfect training sample which is free of penalty for each action category. The purpose of this split is  
23 to ensure that when using contrastive regression models for assessment, the reference exemplar itself  
24 is error-free. This avoids the ambiguity that execution errors in the exemplars might introduce into  
25 the scoring process. The ground truth used in the experiments is the performance score, which is  
26 obtained by subtracting all penalty scores from a perfect score of 5.0. More details of penalty scores  
27 is provided in section B.2.

## 28 A.2 Evaluation Metrics

29 We employ two metrics in our experiments: Spearman’s rank correlation ( $\rho$ ) and relative L2  
30 distance( $R-\ell_2$ ). Spearman’s rank correlation assesses the rank correlation between predictions  
31 and ground-truth scores, defined as:

$$\rho = \frac{\sum_i (p_i - \bar{p})(q_i - \bar{q})}{\sqrt{\sum_i (p_i - \bar{p})^2 \sum_i (q_i - \bar{q})^2}} \quad (1)$$

32 where  $p$  and  $q$  represent the rankings of predictions and ground-truth scores, respectively. The relative  
33 L2 distance focuses on the numerical scoring difference between predictions and ground-truth scores.  
34 Given the highest and lowest scores of an action, denoted as  $y_{\max}$  and  $y_{\min}$ , respectively,  $R-\ell_2$  is  
35 defined as:

$$R-\ell_2 = \frac{1}{N} \sum_{i=1}^N \left( \frac{|y_i - \hat{y}_i|}{y_{\max} - y_{\min}} \right)^2 \quad (2)$$

36 where  $y_i$  and  $\hat{y}_i$  indicate the ground-truth and predicted scores for the  $i$ -th sample, respectively.

## 37 A.3 Baselines

38 **USDL**[7] is a direct regression approach that uses a 3-layer MLP as action decoder and a temporal  
39 pooling layer followed by a softmax layer as score regressor.

40 **CoRe** [10] combines feature of target and exemplar from I3D with exemplar score as pair encoder,  
41 then pass to a group-aware regression tree as score regressor.

42 **TSA** [8] uses temporal segmentation modules composed by convolution layers and linear block as  
43 action decoder, a multi-head transformer block as pair encoder and a 2-layer MLP as score regressor.

44 **TPT** [1] adopt learnable queries to decode action sequences into a fixed number of temporal-aware  
45 part representations. It uses a 2-layer transformer block as action decoder, a 2-layer MLP as pair  
46 encoder and another 2-layer MLP as score regressor.

## 47 A.4 Implementation Details

48 We adopt I3D pretrained on Kinetics [2] as video backbone with 1024 output dimension and ST-  
49 GCN [9] pretrained on NTU RGB+D[6] as pose backbone with 256 output dimension. Following  
50 [4, 1], we evenly sample 103 frames for each video or pose sequence, split them into 20 clips with  
51 length 8 frames and stride 5 frames, then fed them into backbone. The action decoder is a transformer  
52 block with 2 layers, 2 query clusters and 512 feature dimension. The pair encoder is a 2-layer MLP  
53 with dimension (512, 256), (256, 256). The regressor and extra penalty heads are 3-layer MLP with  
54 dimension (256, 256), (256, 64), (64, 1). We set the initial learning rate to  $10^{-4}$  for action decoder  
55 and pair encoder,  $10^{-3}$  for regressor and penalty heads. We utilize Adam optimizer [3] and set weight  
56 decay to 0. In main experiments, we set the number of exemplar for voting as 2 for LucidAction and  
57 10 for AQA-7, MTL-AQA, FineDiving during inference. The training epoch is 250 for AQA-7 and  
58 MLT-AQA, 170 for Finediving and 150 for LucidAction. We use multiple GeForce RTX 4090 GPUs  
59 for a total of about 3840 GPU-hours for data pre-process and experiments. We run each experiment  
60 three times with different random seed to account for variability and ensure the robustness of the  
61 results. We will release the LucidAction dataset and provide the code of baselines soon to promote  
62 future research on action quality assessment.

## 63 A.5 Ablation Settings

64 In the multi-view ablation study, we compare the single-view input baseline model with multi-view  
65 input models employing batch or channel strategies on LucidAction. The batch strategy places  
66 multiple views in the batch dimension, treating them as separate samples, while the channel strategy  
67 positions different views on the channel dimension within one sample. We also investigate the effects



of various positions for channel fusion after each module in the baseline architecture and different fusion options (Opt), namely concatenation (Cat) and averaging (Avg). To ensure a fair comparison, we expand the dimensions of the corresponding modules in base, batch, and channel-average models to match those in channel-concatenate models. For instance, when fuse position is after I3D backbone, the input dimension of action decoder will double from 1024 to 2048, while others remain unchanged.

In the curriculum learning ablation study, model using the mixed training strategy is trained for 150 epochs on the shuffled mixture of training data from up to the test level. In contrast, model using the curriculum learning strategy is trained for 150 epochs on the training data for each level, sequentially from low to high up to the test level. For example, when test level is level 5, the curriculum learning model is trained in the order of levels 3-4-5. By this ablation setting we ensure that both models use an equal amount of training data, thereby guaranteeing the comparability of the results.

## A.6 Ablation on Context Quality and Quantity

A key design concept of contrastive regression is to provide exemplars with known scores as context. In this section, we designed two sets of ablation experiments to examine how the quality and quantity of provided context from LucidAction affect the results of AQA.

We first investigate the impact of the candidates pool of exemplar selection on the effectiveness of AQA. In Table 1a, method "None" is the no-context baseline that performs direct regression on target performance score. Other models predict the relative score with different candidate pools of exemplars. method "All" randomly selects exemplars from all training samples, while method "Level" and method "Act" require exemplars to have the same curriculum level and same action category respectively with the target. Due to the penalty-based annotation, LucidAction has at least one perfect training sample without any execution errors for each action category. Therefore, we also compared the "Act+Perf" method that requires exemplars to be both error-free and within same action category as the target. In this ablation. As shown in Table 1a, "Act" elevates model performance from 0.586 in "All" to 0.672, achieving a 14.7% improvement, demonstrating that providing context from the same action category anchors the model's sensibility into a more accessible differential evaluation of similar action sequence, thereby reducing the complexity of model learning. Furthermore, the performance of "Act+Perf" improves further to 0.701. Perfect examples provide unambiguous references for the model, maintaining consistency in the mapping from execution differences to relative scores across different target-exemplar pairs, thus avoiding confusion in quality assessment standards caused by errors inherent in exemplars. It shows the superiority of stable but diverse action quality facilitated by the systematic curriculum-based data collection methods in LucidAction compared to collecting one-shot performances in public competitions.

Table 1: Ablation studies regarding the quality and quantity of contrastive regression contexts.

| (a) Ablation study of exemplar candidate pool. |                 |                                   | (b) Ablation study of voting exemplars number. |                 |                                   |
|------------------------------------------------|-----------------|-----------------------------------|------------------------------------------------|-----------------|-----------------------------------|
| Candidates                                     | $\rho \uparrow$ | $R-\ell_2(\times 100) \downarrow$ | #Exemplar                                      | $\rho \uparrow$ | $R-\ell_2(\times 100) \downarrow$ |
| None.                                          | 0.547           | 0.704                             | 0                                              | 0.547           | 0.704                             |
| All.                                           | 0.586           | 0.681                             | 1                                              | 0.681           | 0.658                             |
| Level.                                         | 0.614           | 0.673                             | 2                                              | <b>0.701</b>    | 0.624                             |
| Act.                                           | 0.672           | 0.633                             | 3                                              | 0.698           | <b>0.620</b>                      |
| Act.+Perf.                                     | <b>0.701</b>    | <b>0.624</b>                      | 5                                              | 0.696           | 0.623                             |

100

Then, We investigate the model's performance concerning the number of voting exemplars during inference, where the final score is the average of the predicted scores from all target-exemplar pairs. The exemplar candidate pool is "Act+Perf" in this ablation study. If the number of perfect training samples in the action category is less than the desired number of exemplars, repeated sampling is performed from the perfect samples. As shown in Table 1b, providing one exemplar results in a 24.5% improvement in model performance compared to direct regression method with no exemplar, increasing from 0.547 to 0.681 in correlation, thus demonstrating the effectiveness of contrastive

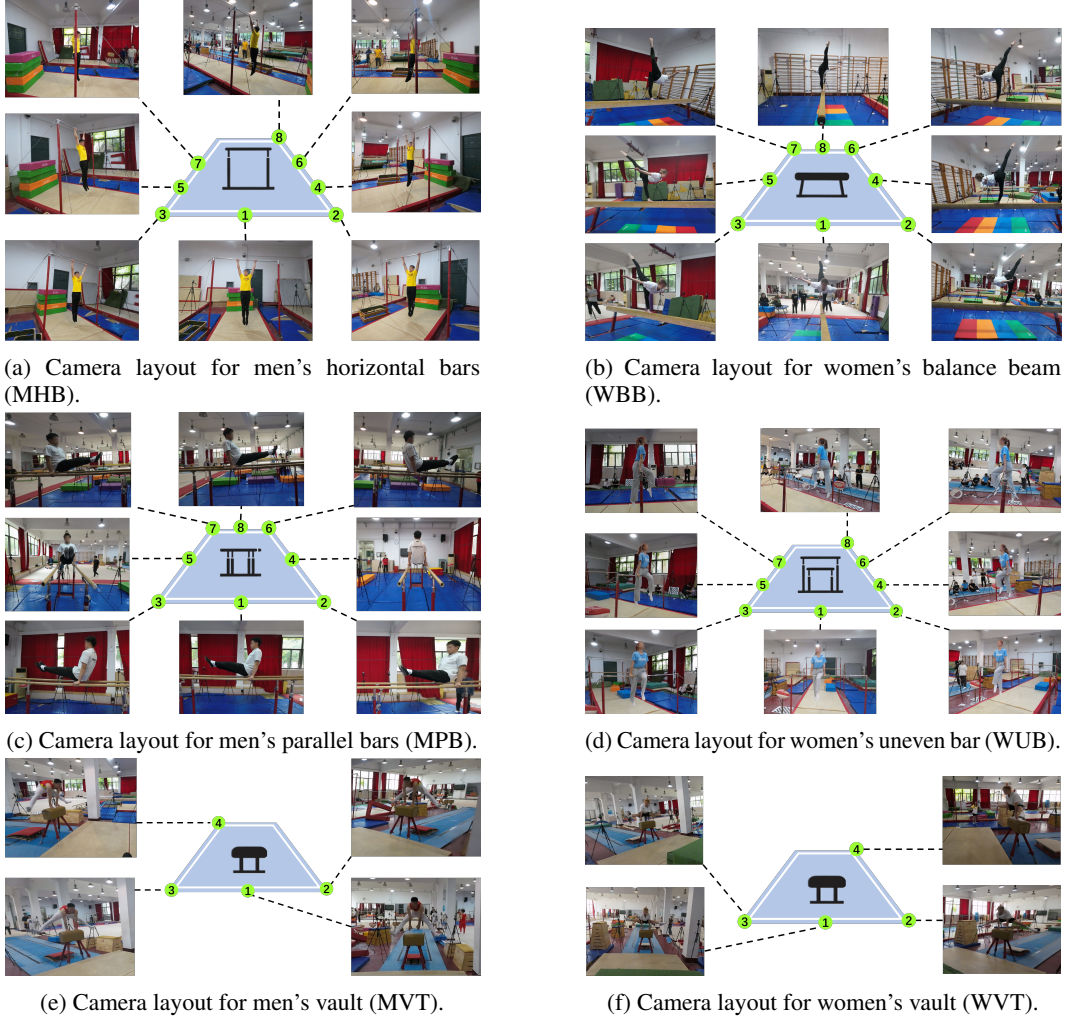

Figure 1: Camera layout and corresponding frames for each event.

108 regression. However, the improvement becomes less pronounced as the number of exemplars reaches  
 109 two, suggesting that optimal results can be attained in practical inference without a large number of  
 110 exemplars.

## 111 B. The LucidAction Dataset Details

### 112 B.1 Multi-View Motion Capture

113 Figure 1 are the illustration of camera layout and corresponding frames for event vault (MVT, WVT),  
 114 men's parallel bars (MPB), horizontal bars (MHB), women's uneven bar (WUB) and women's  
 115 balance beam (WBB).

### 116 B.2 Detailed Penalty Items Annotation.

117 One open question of AQA is whether the model reasoning ability towards concept of action quality  
 118 can improve when specific execution errors with semantic meaning, rather than a final score, is  
 119 provided. The annotations of LucidAction contains detailed penalty items and penalty scores for  
 120 execution errors in actions as extra supervision: All actions share an error set  $E = \{e_i\}_{i=1}^N$ , each  
 121 error item has a corresponding penalty set  $P_i = \{p_i^1, \dots, p_i^M\}$  consisting of the admissible penalty

score w.r.t error  $e_i$ . penalty score  $p_i^j \in [0, 1]$  denotes the severity of the error  $e_i$  from mild to severe. During training and inference, model predict the penalty score  $p_i$  for each error item  $e_i$  given a paired target action with a non-error exemplar. The error reasoning paradigm is consistent with both the human referee assessing process and the score annotation method of the proposed LucidAction dataset. For example, in action *Forward Roll*, an error  $e_i$  could be *Rolling not smooth* with penalty set  $P_i = \{0, 0.1, 0.3, 0.5, 1\}$ , 0 indicate the roll is perfectly smooth and 1 as not smooth at all. In action *Side Kick*, error *Angle deviation* with penalty set  $P_i = \{0, 0.1, 0.3, 0.5, 1\}$  corresponding to {no deviation, <30°, >30°- 60°, >60°- 90°, >90°}.

### B.3 Privacy and Ethical Considerations

During the data collection process, in order to ensure the integrity of the captured actions in the frame, it is inevitable to capture the athletes' faces. To this end, we apply automatic anonymization of faces on all videos in our proposed LucidAction dataset with open-source toolkit deface<sup>1</sup>, and a consent form is provided by all the participants agreeing on being recorded and making the captured video publicly available for research purposes.

### B.4 Descriptions of Action Categories

Table 2 shows the detailed descriptions of action categories within each curriculum level and sport event.

Table 2: The detailed descriptions of action categories.

| Index | Event | Level | Action Code | Description                                             |
|-------|-------|-------|-------------|---------------------------------------------------------|
| 0     | MFE   | 3     | MFE3X00     | Forward Roll                                            |
| 1     | MFE   | 3     | MFE3X01     | Turn Left 180°                                          |
| 2     | MFE   | 3     | MFE3X02     | Shoulder Elbow Stand                                    |
| 3     | MFE   | 3     | MFE3X03     | Hollow Body Single Leg Sit-up (Left and Right Leg Each) |
| 4     | MFE   | 3     | MFE3X04     | Forward Bend from Sitting Position (2")                 |
| 5     | MFE   | 3     | MFE3X05     | Backward Roll                                           |
| 6     | MFE   | 3     | MFE3X06     | Jump Turn 180°                                          |
| 7     | MFE   | 4     | MFE4T00     | Forward Roll                                            |
| 8     | MFE   | 4     | MFE4T01     | Swallow Balance                                         |
| 9     | MFE   | 4     | MFE4T02     | Front Flip                                              |
| 10    | MFE   | 4     | MFE4T03     | Body Leap                                               |
| 11    | MFE   | 4     | MFE4X00     | Horizontal Split                                        |
| 12    | MFE   | 4     | MFE4X01     | Vertical Split (Left Leg in Front)                      |
| 18    | MFE   | 4     | MFE4X02     | Vertical Split (Right Leg in Front)                     |
| 19    | MFE   | 4     | MFE4X03     | Turn Right 180° to Horizontal Split                     |
| 20    | MFE   | 4     | MFE4X04     | Horizontal Split to Prone Position                      |
| 21    | MFE   | 4     | MFE4X05     | Prone Support with Arms Sideways to Body Side           |
| 22    | MFE   | 4     | MFE4X06     | Prone Knee Bend to Kneel Stand                          |
| 23    | MFE   | 4     | MFE4X07     | Forward Roll                                            |
| 24    | MFE   | 4     | MFE4X08     | Jump Turn 180°                                          |
| 25    | MFE   | 4     | MFE4X09     | Single Leg Balance (2")                                 |
| 13    | MFE   | 4     | MFE4X10     | Backward Roll from Hollow Body Position                 |
| 14    | MFE   | 4     | MFE4X11     | Shoulder Elbow Stand (2")                               |
| 15    | MFE   | 4     | MFE4X12     | Forward Roll to Stand Up                                |
| 16    | MFE   | 4     | MFE4X13     | Side Flip                                               |
| 17    | MFE   | 4     | MFE4X14     | Turn Left 90° and Stand Up                              |
| 26    | MFE   | 5     | MFE5T00     | Forward Roll Split Stand                                |
| 27    | MFE   | 5     | MFE5T01     | Forward Roll to Right Angle Sit                         |
| 28    | MFE   | 5     | MFE5T02     | Backward Shoulder Elbow Stand                           |
| 29    | MFE   | 5     | MFE5T03     | Single Shoulder Backward Roll                           |
| 30    | MFE   | 5     | MFE5T04     | Kneeling Balance on One Knee                            |
| 31    | MFE   | 5     | MFE5T05     | Kneel to Sit Jump Up                                    |
| 32    | MFE   | 5     | MFE5X00     | Swallow Balance (2")                                    |
| 33    | MFE   | 5     | MFE5X01     | Horizontal Split                                        |
| 38    | MFE   | 5     | MFE5X02     | Vertical Split (Left and Right Each)                    |
| 39    | MFE   | 5     | MFE5X03     | Horizontal Split to Prone Position                      |
| 40    | MFE   | 5     | MFE5X04     | Prone Straight Leg to Stand Up                          |
| 41    | MFE   | 5     | MFE5X05     | Step Forward Handstand                                  |
| 42    | MFE   | 5     | MFE5X06     | Handstand Forward Roll to Split Support (2")            |
| 43    | MFE   | 5     | MFE5X07     | Straddle Push-up; Draw Legs; Kneel Push-up to Stand     |
| 44    | MFE   | 5     | MFE5X08     | Forward Roll Straight Leg Stand                         |
| 45    | MFE   | 5     | MFE5X09     | Headstand (2")                                          |
| 34    | MFE   | 5     | MFE5X10     | Forward Bend to Push-up                                 |

<sup>1</sup><https://github.com/ORB-HD/deface>

|     |     |   |         |                                                                                       |
|-----|-----|---|---------|---------------------------------------------------------------------------------------|
| 35  | MFE | 5 | MFE5X11 | Push-up Turn Right 180° to Right Angle Sit                                            |
| 36  | MFE | 5 | MFE5X12 | Backward Roll Straight Leg Stand                                                      |
| 37  | MFE | 5 | MFE5X13 | Step Side Flip (2 Times)                                                              |
| 46  | MFE | 6 | MFE6T00 | Side Flip with 90° Turn                                                               |
| 47  | MFE | 6 | MFE6T01 | Forward Roll Split Stand                                                              |
| 48  | MFE | 6 | MFE6T02 | Split Stand Slow Start Handstand                                                      |
| 49  | MFE | 6 | MFE6T03 | Forward Roll to Right Angle Sit                                                       |
| 50  | MFE | 6 | MFE6T04 | Backward Roll Straight Leg Stand                                                      |
| 51  | MFE | 6 | MFE6X00 | Step Forward Handstand                                                                |
| 52  | MFE | 6 | MFE6X01 | Single Leg Swing to Handstand                                                         |
| 56  | MFE | 6 | MFE6X02 | Handstand Forward Roll to Split Support                                               |
| 57  | MFE | 6 | MFE6X03 | Split Support Slow Start to Handstand                                                 |
| 58  | MFE | 6 | MFE6X04 | Left Leg Forward Kick Right Leg Exchange Jump                                         |
| 59  | MFE | 6 | MFE6X05 | Step Side Flip (Consecutive 2 Times)                                                  |
| 60  | MFE | 6 | MFE6X06 | Forward Bend to Single Leg Lift to Prone Position                                     |
| 61  | MFE | 6 | MFE6X07 | Straddle Push-up; Turn Right 180° to Right Angle Sit                                  |
| 62  | MFE | 6 | MFE6X08 | Forward Bend Backward Roll to Handstand                                               |
| 63  | MFE | 6 | MFE6X09 | Handstand Single Leg Bend Downward Jump Turn 45° to Stand                             |
| 53  | MFE | 6 | MFE6X10 | Side Flip with 90° Inside Turn                                                        |
| 54  | MFE | 6 | MFE6X11 | Vertical Jump and Land                                                                |
| 55  | MFE | 6 | MFE6X12 | Backward Flip Jump and Land to Stand                                                  |
| 64  | MHB | 3 | MHB3X00 | Overhand Dead Hang Swing                                                              |
| 65  | MHB | 4 | MHB4X00 | Forward 4 Steps and Lift Hips                                                         |
| 66  | MHB | 4 | MHB4X01 | Forward 4 Steps and Turn 180°                                                         |
| 67  | MHB | 4 | MHB4X02 | Walk forward; swing back to standing position                                         |
| 68  | MHB | 4 | MHB4X03 | Kick feet to ground                                                                   |
| 69  | MHB | 4 | MHB4X04 | Backward swing dismount                                                               |
| 70  | MHB | 5 | MHB5T00 | Jump up to support                                                                    |
| 71  | MHB | 5 | MHB5T01 | Support backward swing                                                                |
| 72  | MHB | 5 | MHB5T02 | Single leg swing to straddle support                                                  |
| 73  | MHB | 5 | MHB5T03 | Back leg swings to the side                                                           |
| 74  | MHB | 5 | MHB5X00 | Tuck and flip up to support                                                           |
| 75  | MHB | 5 | MHB5X01 | Swing backward to shoulder level                                                      |
| 76  | MHB | 5 | MHB5X02 | Slow descent from front flip to dead hang                                             |
| 77  | MHB | 5 | MHB5X03 | Hang swing; back swing; swinging in dead hang                                         |
| 78  | MHB | 5 | MHB5X04 | Forward and backward swing to dismount                                                |
| 79  | MHB | 6 | MHB6T00 | Flip up to support                                                                    |
| 80  | MHB | 6 | MHB6T01 | Single leg swing to straddle support                                                  |
| 81  | MHB | 6 | MHB6T02 | Backward swing single leg hang                                                        |
| 82  | MHB | 6 | MHB6T03 | Turn 180° to support                                                                  |
| 83  | MHB | 6 | MHB6T04 | Backward swing dismount                                                               |
| 84  | MHB | 6 | MHB6X00 | Overhand dead hang swing; lift hips after swinging                                    |
| 85  | MHB | 6 | MHB6X01 | Forward swing; bend and straighten legs to lift up                                    |
| 86  | MHB | 6 | MHB6X02 | Backward swing to support; swing back to dead hang                                    |
| 87  | MHB | 6 | MHB6X03 | Arc swing from backward to forward swing                                              |
| 88  | MHB | 6 | MHB6X04 | Swinging in dead hang                                                                 |
| 89  | MHB | 6 | MHB6X05 | Backward swing dismount                                                               |
| 90  | MPB | 3 | MPB3X00 | Jump up to support                                                                    |
| 91  | MPB | 4 | MPB4T00 | Jump up to support                                                                    |
| 92  | MPB | 4 | MPB4T01 | Sequentially move support forward                                                     |
| 93  | MPB | 4 | MPB4T02 | Tucked L-Sit on Parallel Bars                                                         |
| 94  | MPB | 4 | MPB4T03 | Jump off bars                                                                         |
| 95  | MPB | 4 | MPB4X00 | Jump up to support                                                                    |
| 96  | MPB | 4 | MPB4X01 | Small swing below bar level                                                           |
| 97  | MPB | 4 | MPB4X02 | Forward swing to one bar side sit                                                     |
| 98  | MPB | 4 | MPB4X03 | Turn 90° out; jump off in straddle position                                           |
| 99  | MPB | 5 | MPB5T00 | Jump up to straddle sit                                                               |
| 100 | MPB | 5 | MPB5T01 | Straddle sit forward to straddle sit                                                  |
| 101 | MPB | 5 | MPB5T02 | Straddle sit forward                                                                  |
| 102 | MPB | 5 | MPB5T03 | Forward swing to side sit                                                             |
| 103 | MPB | 5 | MPB5T04 | Forward swing to right angle between two bars                                         |
| 104 | MPB | 5 | MPB5X00 | Swinging in dead hang                                                                 |
| 105 | MPB | 5 | MPB5X01 | Forward swing; bend and straighten legs to lift up to straddle support                |
| 106 | MPB | 5 | MPB5X02 | Slowly rise to shoulder level with legs split                                         |
| 107 | MPB | 5 | MPB5X03 | Swinging in support; back and forth                                                   |
| 108 | MPB | 5 | MPB5X04 | Forward and backward swing; jump off in single arm support (60°)                      |
| 109 | MPB | 6 | MPB6T00 | Jump up to right angle support (2")                                                   |
| 110 | MPB | 6 | MPB6T01 | Forward lean to straddle sit                                                          |
| 111 | MPB | 6 | MPB6T02 | Straddle sit forward                                                                  |
| 112 | MPB | 6 | MPB6T03 | Backward swing 180° to straddle sit                                                   |
| 113 | MPB | 6 | MPB6T04 | Spring bars forward swing                                                             |
| 114 | MPB | 6 | MPB6T05 | Backward and forward swing to right (left) single bar support (60°) dismount          |
| 115 | MPB | 6 | MPB6X00 | Inside grip dead hang; lift legs forward in arc swing to backward swing               |
| 116 | MPB | 6 | MPB6X01 | Swinging in dead hang                                                                 |
| 117 | MPB | 6 | MPB6X02 | Forward swing                                                                         |
| 118 | MPB | 6 | MPB6X03 | Slowly rise to shoulder level with legs split; support with legs together             |
| 119 | MPB | 6 | MPB6X04 | Swinging in support; back and forth                                                   |
| 120 | MPB | 6 | MPB6X05 | Forward and backward swing to right (left) side; jump off in single bar support (60°) |

|     |     |   |         |                                                                             |
|-----|-----|---|---------|-----------------------------------------------------------------------------|
| 121 | MVT | 3 | MVT3X00 | Run-up onto board and jump onto high mat with straight body                 |
| 122 | MVT | 4 | MVT4T00 | Goat Split Leap                                                             |
| 123 | MVT | 4 | MVT4X00 | Run-up onto board and jump onto high mat with tucked body                   |
| 124 | MVT | 5 | MVT5T00 | Goat Bent Leg Leap                                                          |
| 125 | MVT | 5 | MVT5X00 | Jump onto forward roll                                                      |
| 126 | MVT | 6 | MVT6T00 | Horizontal Box Split Jump                                                   |
| 127 | MVT | 6 | MVT6X00 | Run-up onto board and jump into handstand on mat                            |
| 128 | WBB | 3 | WBB3X00 | Jump onto beam with feet together and stand upright                         |
| 129 | WBB | 3 | WBB3X01 | Take one step forward                                                       |
| 130 | WBB | 3 | WBB3X02 | Rise up on toes once                                                        |
| 131 | WBB | 3 | WBB3X03 | Straight body jump                                                          |
| 132 | WBB | 3 | WBB3X04 | Step forward to beam and stand with feet together                           |
| 133 | WBB | 3 | WBB3X05 | Straight body jump down                                                     |
| 134 | WBB | 4 | WBB4T00 | Swing back to squat support and stand upright                               |
| 135 | WBB | 4 | WBB4T01 | Take 4 steps forward                                                        |
| 136 | WBB | 4 | WBB4T02 | Turn 180° with feet together                                                |
| 137 | WBB | 4 | WBB4T03 | Take 4 steps backward                                                       |
| 138 | WBB | 4 | WBB4T04 | Vertical jump                                                               |
| 139 | WBB | 4 | WBB4T05 | Turn 90° with feet together                                                 |
| 140 | WBB | 4 | WBB4T06 | Jump off from horizontal beam                                               |
| 141 | WBB | 4 | WBB4X00 | Swing back to squat                                                         |
| 142 | WBB | 4 | WBB4X01 | Take one step forward                                                       |
| 143 | WBB | 4 | WBB4X02 | Turn 180° with feet together                                                |
| 144 | WBB | 4 | WBB4X03 | Take one step backward                                                      |
| 145 | WBB | 4 | WBB4X04 | Straight body jump                                                          |
| 146 | WBB | 4 | WBB4X05 | Straight body jump down                                                     |
| 147 | WBB | 5 | WBB5T00 | Jump onto beam sideways; turn 180° into straddle support                    |
| 148 | WBB | 5 | WBB5T01 | Kneeling balance (2")                                                       |
| 149 | WBB | 5 | WBB5T02 | Take one step forward into single-leg stand                                 |
| 150 | WBB | 5 | WBB5T03 | Single-leg jump and land with both heels raised and stand upright           |
| 151 | WBB | 5 | WBB5T04 | Take one step forward; squat and turn 180° into upright position            |
| 152 | WBB | 5 | WBB5T05 | Leg kicks during movement (front; side; back; left and right leg each once) |
| 153 | WBB | 5 | WBB5T06 | Turn 90° with feet together                                                 |
| 154 | WBB | 5 | WBB5T07 | Jump off from horizontal beam with split legs                               |
| 155 | WBB | 5 | WBB5X00 | Jump onto beam and hold straddle support (hold for 2")                      |
| 156 | WBB | 5 | WBB5X01 | Leg kicks during movement (front; right leg)                                |
| 158 | WBB | 5 | WBB5X02 | Leg kicks during movement (front; left leg)                                 |
| 159 | WBB | 5 | WBB5X03 | Leg kicks during movement (side; right leg)                                 |
| 160 | WBB | 5 | WBB5X04 | Leg kicks during movement (side; left leg)                                  |
| 161 | WBB | 5 | WBB5X05 | Leg kicks during movement (back; right leg)                                 |
| 162 | WBB | 5 | WBB5X06 | Leg kicks during movement (back; left leg)                                  |
| 163 | WBB | 5 | WBB5X07 | Straight body jump; switch legs mid-air and jump                            |
| 164 | WBB | 5 | WBB5X08 | Turn 180° with feet together                                                |
| 165 | WBB | 5 | WBB5X09 | Swallow balance (2")                                                        |
| 166 | WBB | 5 | WBB5X10 | Jump off from beam with feet together and straight body forward             |
| 166 | WBB | 6 | WBB6X00 | Jump onto beam and hold straddle support (2")                               |
| 167 | WBB | 6 | WBB6X01 | Leg kicks during movement (front; right leg)                                |
| 174 | WBB | 6 | WBB6X02 | Leg kicks during movement (front; left leg)                                 |
| 175 | WBB | 6 | WBB6X03 | Leg kicks during movement (side; right leg)                                 |
| 176 | WBB | 6 | WBB6X04 | Leg kicks during movement (side; left leg)                                  |
| 177 | WBB | 6 | WBB6X05 | Leg kicks during movement (back; right leg)                                 |
| 178 | WBB | 6 | WBB6X06 | Leg kicks during movement (back; left leg)                                  |
| 179 | WBB | 6 | WBB6X07 | Vertical split jump                                                         |
| 180 | WBB | 6 | WBB6X08 | Straight body jump; switch legs mid-air and jump                            |
| 181 | WBB | 6 | WBB6X09 | Wolf jump                                                                   |
| 168 | WBB | 6 | WBB6X10 | Single-leg turn 180°                                                        |
| 169 | WBB | 6 | WBB6X11 | Forward somersault                                                          |
| 170 | WBB | 6 | WBB6X12 | Sideways somersault; turn 90° into lunge position                           |
| 171 | WBB | 6 | WBB6X13 | Leg extension balance (2")                                                  |
| 172 | WBB | 6 | WBB6X14 | Body wave                                                                   |
| 173 | WBB | 6 | WBB6X15 | Jump off from beam with feet together and straight body backward            |
| 182 | WFE | 3 | WFE3X00 | Roll Forward in Tuck Position                                               |
| 183 | WFE | 3 | WFE3X01 | Backward Roll in Tuck Position                                              |
| 186 | WFE | 3 | WFE3X02 | Shoulder Elbow Stand (2")                                                   |
| 187 | WFE | 3 | WFE3X03 | Straddle Jump                                                               |
| 188 | WFE | 3 | WFE3X04 | Front Split (Left Leg in Front)                                             |
| 189 | WFE | 3 | WFE3X05 | Front Split (Right Leg in Front)                                            |
| 190 | WFE | 3 | WFE3X06 | Front Kick (Left Leg) during movement                                       |
| 191 | WFE | 3 | WFE3X07 | Sideways Kick (Right Leg) during movement                                   |
| 192 | WFE | 3 | WFE3X08 | Back Kick (Left Leg) during movement                                        |
| 193 | WFE | 3 | WFE3X09 | Front Kick (Right Leg) during movement                                      |
| 184 | WFE | 3 | WFE3X10 | Sideways Kick (Left Leg) during movement                                    |
| 185 | WFE | 3 | WFE3X11 | Back Kick (Right Leg) during movement                                       |
| 194 | WFE | 4 | WFE4T00 | Forward Roll in Tuck Position                                               |
| 195 | WFE | 4 | WFE4T01 | Swallow Balance                                                             |
| 196 | WFE | 4 | WFE4T02 | Leap with Extended Support                                                  |
| 197 | WFE | 4 | WFE4T03 | Straddle Jump                                                               |
| 198 | WFE | 4 | WFE4X00 | Forward Roll in Pike Position to Straight Leg Stand                         |
| 199 | WFE | 4 | WFE4X01 | Forward Roll                                                                |

|     |     |   |         |                                                                 |
|-----|-----|---|---------|-----------------------------------------------------------------|
| 200 | WFE | 4 | WFE4X02 | Backward Roll                                                   |
| 201 | WFE | 4 | WFE4X03 | Side Aerial                                                     |
| 202 | WFE | 4 | WFE4X04 | 180° Straight Jump Turn                                         |
| 203 | WFE | 4 | WFE4X05 | Swallow Balance (2")                                            |
| 204 | WFE | 4 | WFE4X06 | Body Wave                                                       |
| 205 | WFE | 5 | WFE5T00 | Front Roll with Split Leg Stand                                 |
| 206 | WFE | 5 | WFE5T01 | Front Roll to Sit in Right Angle                                |
| 207 | WFE | 5 | WFE5T02 | Back Shoulder Elbow Stand                                       |
| 208 | WFE | 5 | WFE5T03 | One Arm Back Roll                                               |
| 209 | WFE | 5 | WFE5T04 | One Knee to Kneel Balance                                       |
| 210 | WFE | 5 | WFE5T05 | Kneeling Push-Up to Sit to Kneel Jump                           |
| 211 | WFE | 5 | WFE5X00 | Forward Roll to Sit in Right Angle                              |
| 212 | WFE | 5 | WFE5X01 | Backward Roll                                                   |
| 213 | WFE | 5 | WFE5X02 | Side Aerial                                                     |
| 214 | WFE | 5 | WFE5X03 | Back Layout                                                     |
| 215 | WFE | 5 | WFE5X04 | Front Split                                                     |
| 216 | WFE | 5 | WFE5X05 | Side Split                                                      |
| 217 | WFE | 5 | WFE5X06 | Straddle Jump                                                   |
| 218 | WFE | 5 | WFE5X07 | Western Jump                                                    |
| 219 | WFE | 5 | WFE5X08 | 360° Straight Jump Turn                                         |
| 220 | WFE | 6 | WFE6T00 | Sideways Aerial with 90° Turn                                   |
| 221 | WFE | 6 | WFE6T01 | Front Roll with Split Leg Stand                                 |
| 222 | WFE | 6 | WFE6T02 | Front Roll to Stand                                             |
| 223 | WFE | 6 | WFE6T03 | Swallow Balance                                                 |
| 224 | WFE | 6 | WFE6T04 | Back Leg Extended into Front Split                              |
| 225 | WFE | 6 | WFE6T05 | Front Leg Extended into Right Angle Sit                         |
| 226 | WFE | 6 | WFE6T06 | Backward Roll to Stand                                          |
| 227 | WFE | 6 | WFE6X00 | Three-Step Run-Up into Double Leg Front Handspring              |
| 228 | WFE | 6 | WFE6X01 | Three-Step Run-Up into Take-Off Step Jointed with Straight Jump |
| 229 | WFE | 6 | WFE6X02 | Front Layout into Back Layout                                   |
| 230 | WFE | 6 | WFE6X03 | 360° Turn on One Foot                                           |
| 231 | WFE | 6 | WFE6X04 | Parallel Feet Jump                                              |
| 232 | WFE | 6 | WFE6X05 | Long Stride Jump                                                |
| 233 | WFE | 6 | WFE6X06 | Wolf Jump                                                       |
| 234 | WFE | 6 | WFE6X07 | Split Jump with Straight Body                                   |
| 235 | WFE | 6 | WFE6X08 | Backward Roll to Handstand                                      |
| 236 | WUB | 3 | WUB3X00 | Tuck In 90° during Roll                                         |
| 237 | WUB | 3 | WUB3X01 | Change Hands Left to Right                                      |
| 238 | WUB | 3 | WUB3X02 | Overhand Grip Hang (10")                                        |
| 239 | WUB | 3 | WUB3X03 | Drop Down to Stand                                              |
| 240 | WUB | 4 | WUB4X00 | Jump Up to Support (3")                                         |
| 241 | WUB | 4 | WUB4X01 | Consecutive Support and Back Swing (Below Horizontal) 2 times   |
| 242 | WUB | 4 | WUB4X02 | Forward Roll to Tuck Hang (2")                                  |
| 243 | WUB | 5 | WUB5X00 | Flick Flack to Handstand                                        |
| 244 | WUB | 5 | WUB5X01 | Back Swing after Support                                        |
| 245 | WUB | 5 | WUB5X02 | Abdominal Roll                                                  |
| 246 | WUB | 5 | WUB5X03 | Back Swing to Straight Body Jump Down                           |
| 247 | WUB | 6 | WUB6X00 | Long Swing Bend Up                                              |
| 248 | WUB | 6 | WUB6X01 | Back Swing after Support (Above Horizontal)                     |
| 249 | WUB | 6 | WUB6X02 | Abdominal Roll to Support                                       |
| 250 | WUB | 6 | WUB6X03 | Legs Together Straight Body Swing to Handstand                  |
| 251 | WUB | 6 | WUB6X04 | Pike Support to Back Swing Bend Down                            |
| 252 | WVT | 3 | WVT3X00 | Run-Up on Springboard to Jump on High Mat with Straight Body    |
| 253 | WVT | 4 | WVT4T00 | Goat Split Leg Vault                                            |
| 254 | WVT | 4 | WVT4X00 | Run-Up on Springboard to Jump on High Mat in Tuck Position      |
| 255 | WVT | 5 | WVT5T00 | Goat Bend Leg Vault                                             |
| 256 | WVT | 5 | WVT5X00 | Run-Up on Springboard to Jump on High Mat with Forward Roll     |
| 257 | WVT | 6 | WVT6T00 | Horizontal box Vault                                            |
| 258 | WVT | 6 | WVT6X00 | TRun-Up on Springboard to Jump on High Mat with Handstand       |

## References

- [1] Yang Bai, Desen Zhou, Songyang Zhang, Jian Wang, Errui Ding, Yu Guan, Yang Long, and Jingdong Wang. Action Quality Assessment with Temporal Parsing Transformer. In *Computer Vision – ECCV 2022*, volume 13664, pages 422–438. Springer Nature Switzerland, 2022. doi: 10.1007/978-3-031-19772-7\_25.
- [2] Joao Carreira and Andrew Zisserman. Quo Vadis, Action Recognition? A New Model and the Kinetics Dataset. In *2017 IEEE Conference on Computer Vision and Pattern Recognition (CVPR)*, pages 4724–4733. IEEE, 2017. doi: 10.1109/CVPR.2017.502.
- [3] Diederik P. Kingma and Jimmy Ba. Adam: A method for stochastic optimization. *CoRR*, abs/1412.6980, 2014. URL <https://api.semanticscholar.org/CorpusID:6628106>.
- [4] Paritosh Parmar and Brendan Morris. Action Quality Assessment Across Multiple Actions. In *2019 IEEE Winter Conference on Applications of Computer Vision (WACV)*, pages 1468–1476, 2019. doi: 10.1109/WACV.2019.00161.
- [5] Paritosh Parmar and Brendan Tran Morris. What and How Well You Performed? A Multitask Learning Approach to Action Quality Assessment. In *Proceedings of the IEEE/CVF Conference on Computer Vision and Pattern Recognition*, pages 304–313, 2019.
- [6] Amir Shahroudy, Jun Liu, Tian-Tsong Ng, and Gang Wang. Ntu rgb+d: A large scale dataset for 3d human activity analysis. In *Proceedings of the IEEE conference on computer vision and pattern recognition*, pages 1010–1019, 2016.
- [7] Yansong Tang, Zanlin Ni, Jiahuan Zhou, Danyang Zhang, Jiwen Lu, Ying Wu, and Jie Zhou. Uncertainty-Aware Score Distribution Learning for Action Quality Assessment. In *2020 IEEE/CVF Conference on Computer Vision and Pattern Recognition (CVPR)*, pages 9836–9845. IEEE, 2020. doi: 10.1109/CVPR42600.2020.00986.
- [8] Jinglin Xu, Yongming Rao, Xumin Yu, Guangyi Chen, Jie Zhou, and Jiwen Lu. FineDiving: A Fine-grained Dataset for Procedure-aware Action Quality Assessment. In *2022 IEEE/CVF Conference on Computer Vision and Pattern Recognition (CVPR)*, pages 2939–2948. IEEE, 2022. doi: 10.1109/CVPR52688.2022.00296.
- [9] Sijie Yan, Yuanjun Xiong, and Dahua Lin. Spatial temporal graph convolutional networks for skeleton-based action recognition. In *AAAI*, 2018.
- [10] Xumin Yu, Yongming Rao, Wenliang Zhao, Jiwen Lu, and Jie Zhou. Group-aware Contrastive Regression for Action Quality Assessment. In *2021 IEEE/CVF International Conference on Computer Vision (ICCV)*, pages 7899–7908. IEEE, 2021. doi: 10.1109/ICCV48922.2021.00782.
